# Supplementary material for: Regulation of microRNA biosynthesis and expression in 2102Ep embryonal carcinoma stem cells is mirrored in ovarian serous adenocarcinoma patients
Source: Springer Nature journal article supplement (doi:10.1186/1757-2215-2-19), 2009-01-01
Supplement: Additional file 5 [file 1757-2215-2-19-s5.pdf]

**Supplementary Table 5.** Comparison of miRNAs in EC cells and OSC patient samples.

159 miRNAs (37 upregulated and 122 downregulated) were specifically expressed in Ovarian Serous Carcinoma (OSC) samples compared to normal ovary. These are ranked and are listed below. 11 of the 203 (55%) miRNAs commonly expressed by both undifferentiated EC cell types were OSC-specific. Of this 55%, 87 miRNAs were upregulated and 24 downregulated. Finally, of the 21 2102Ep-specific miRNAs identified in this study, seven were downregulated and three upregulated in OSC samples, which are listed below. Locations on chromosome 19 and 14 are highlighted in red and blue respectively.

| miRNA UpReg | Undiff EC & Up in OSC | miRNA DownReg | Undiff EC & Down in OSC | 2102Ep & OSC |
|-------------|-----------------------|---------------|-------------------------|--------------|
| miR-10a     | miR-130b              | let-7a        | let-7a                  | <b>Down</b>  |
| miR-130b    | miR-135b              | let-7b        | let-7b                  | miR-376a     |
| miR-135b    | miR-182               | let-7c        | let-7d                  | miR-379      |
| miR-141     | miR-183               | let-7d        | let-7e                  | miR-493      |
| miR-182     | miR-184               | let-7e        | let-7g                  | miR-527      |
| miR-183     | miR-187               | let-7f        | let-7i                  | miR-508      |
| miR-184     | miR-18a               | let-7g        | miR-1                   | miR-503      |
| miR-187     | miR-200b              | let-7i        | miR-100                 | miR-10b      |
| miR-18a     | miR-200c              | miR-1         | miR-101                 | <b>Up</b>    |
| miR-200a    | miR-203               | miR-100       | miR-125a                | miR-213      |
| miR-200b    | miR-20b               | miR-101       | miR-125b                | miR-224      |
| miR-200c    | miR-218               | miR-10b       | miR-126*                | miR-499      |
| miR-203     | miR-31                | miR-125a      | miR-127                 |              |
| miR-20b     | miR-338               | miR-125b      | miR-130a                |              |
| miR-213     | miR-34b               | miR-126*      | miR-132                 |              |
| miR-218     | miR-34c               | miR-127       | miR-133a                |              |
| miR-223     | miR-373               | miR-130a      | miR-133b                |              |
| miR-224     | miR-422a              | miR-132       | miR-134                 |              |
| miR-301     | miR-489               | miR-133a      | miR-136                 |              |
| miR-31      | miR-512-3p            | miR-133b      | miR-140                 |              |
| miR-338     | miR-518a-2*           | miR-134       | miR-143                 |              |
| miR-34b     | miR-519d              | miR-136       | miR-145                 |              |
| miR-34c     | miR-93                | miR-137       | miR-148a                |              |
| miR-373     | miR-95                | miR-140       | miR-151                 |              |
| miR-422a    | miR-130b              | miR-143       | miR-152                 |              |
| miR-429     |                       | miR-145       | miR-154*                |              |
| miR-483     |                       | miR-148a      | miR-17-3p               |              |
| miR-499     |                       | miR-151       | miR-186                 |              |
| miR-512-3p  |                       | miR-152       | miR-188                 |              |
| miR-518a-2* |                       | miR-153       | miR-18a*                |              |
| miR-519d    |                       | miR-154*      | miR-190                 |              |
| miR-522     |                       | miR-17-3p     | miR-192                 |              |
| miR-7       |                       | miR-186       | miR-193a                |              |
| miR-93      |                       | miR-188       | miR-199a                |              |
| miR-95      |                       | miR-189       | miR-204                 |              |
| miR-10a     |                       | miR-18a*      | miR-20a                 |              |

miR-130b  
miR-135b  
miR-141  
miR-182  
miR-183  
miR-184  
miR-187  
miR-18a  
miR-200a  
miR-200b  
miR-200c  
miR-203  
miR-20b  
miR-213  
miR-218  
miR-223  
miR-224  
miR-301  
miR-31  
miR-338  
miR-34b  
miR-34c  
miR-373  
miR-422a  
miR-429  
miR-483  
miR-499  
miR-512-3p  
miR-518a-2\*  
miR-519d  
miR-522  
miR-7  
miR-93  
miR-95  
miR-10a  
miR-130b  
miR-135b  
miR-141  
miR-182  
miR-183  
miR-184  
miR-187  
miR-18a  
miR-200a  
miR-200b  
miR-200c  
miR-203  
miR-20b

miR-190  
miR-192  
miR-193a  
miR-195  
miR-199a  
miR-202  
miR-202\*  
miR-204  
miR-20a  
miR-212  
miR-214  
miR-216  
miR-219  
miR-222  
miR-23b  
miR-26a  
miR-26b  
miR-27b  
miR-28  
miR-299-3p  
miR-133a  
miR-29a  
miR-29b  
miR-30b  
miR-30c  
miR-30e-3p  
miR-30e-5p  
miR-32  
miR-323  
miR-328  
miR-329  
miR-33  
miR-337  
miR-339  
miR-342  
miR-345  
miR-34a  
miR-361  
miR-362  
miR-368  
miR-369-5p  
miR-374  
miR-376a  
miR-376b  
miR-377  
miR-379  
miR-380-3p  
miR-380-5p

miR-212  
miR-214  
miR-219  
miR-222  
miR-23b  
miR-26a  
miR-26b  
miR-27b  
miR-28  
miR-299-5p  
miR-29a  
miR-30b  
miR-30c  
miR-30e-3p  
miR-30e-5p  
miR-32  
miR-328  
miR-329  
miR-33  
miR-337  
miR-299-5p  
miR-342  
miR-345  
miR-34a  
miR-362  
miR-368  
miR-369-5p  
miR-374  
miR-376b  
miR-382  
miR-410  
miR-424  
miR-432  
miR-451  
miR-455  
miR-489  
miR-494  
miR-495  
miR-497  
miR-500  
miR-501  
miR-502  
miR-505  
miR-509  
miR-517b  
miR-520a\*  
miR-520c  
miR-9\*

miR-213  
miR-218  
miR-223  
miR-224  
miR-301  
miR-31  
miR-338  
miR-34b  
miR-34c  
[miR-373](#)  
miR-422a  
miR-429  
miR-483  
miR-499  
miR-512-3p  
[miR-518a-2\\*](#)  
[miR-519d](#)  
[miR-522](#)  
miR-7  
miR-93  
miR-95  
miR-10a  
miR-130b  
miR-135b  
miR-141  
miR-182  
miR-183  
miR-184  
miR-187  
miR-18a  
miR-200a  
miR-200b  
miR-200c  
miR-203  
miR-20b  
miR-213  
miR-218  
miR-223  
miR-224  
miR-301  
miR-31  
miR-338  
miR-34b  
miR-34c  
[miR-373](#)  
miR-422a  
miR-429  
miR-483

[miR-381](#)  
[miR-382](#)  
miR-383  
[miR-410](#)  
miR-424  
[miR-432](#)  
[miR-433](#)  
miR-450  
miR-451  
miR-455  
[miR-485-5p](#)  
miR-486  
miR-488  
miR-489  
[miR-493](#)  
[miR-494](#)  
[miR-495](#)  
miR-497  
miR-500  
miR-501  
miR-502  
miR-503  
miR-505  
miR-506  
miR-507  
miR-508  
miR-509  
[miR-517b](#)  
[miR-520a\\*](#)  
[miR-520c](#)  
[miR-527](#)  
miR-9\*  
miR-92  
miR-99a  
miR-UL112-1  
let-7a  
let-7b  
let-7c  
let-7d  
[let-7e](#)  
let-7f  
let-7g  
let-7i  
miR-1  
miR-100  
miR-101  
miR-10b  
[miR-125a](#)

miR-92  
miR-99a  
miR-UL112-1  
let-7a  
let-7b  
let-7d  
[let-7e](#)  
let-7g  
let-7i  
miR-1  
miR-100  
miR-101  
[miR-125a](#)  
miR-125b  
miR-126\*  
[miR-127](#)  
miR-130a  
miR-132  
miR-133a  
miR-133b  
[miR-134](#)  
[miR-136](#)  
miR-140  
miR-143

miR-499  
miR-512-3p  
miR-518a-2\*  
miR-519d  
miR-522  
miR-7  
miR-93  
miR-95  
miR-10a  
miR-130b  
miR-135b  
miR-141  
miR-182  
miR-183  
miR-184  
miR-187  
miR-18a  
miR-200a  
miR-200b  
miR-200c  
miR-203  
miR-20b  
miR-213  
miR-218  
miR-223  
miR-224  
miR-301

miR-125b  
miR-126\*  
miR-127  
miR-130a  
miR-132  
miR-133a  
miR-133b  
miR-134  
miR-136  
miR-137  
miR-140  
miR-143  
miR-145  
miR-148a  
miR-151  
miR-152  
miR-153  
miR-154\*  
miR-17-3p  
miR-186  
miR-188  
miR-189  
miR-18a\*  
miR-190  
miR-192  
miR-193a
